# Supplementary material
Source: PubMed Central journal article supplement (PMC3041857)

## Supporting Information

# 2-Aminothiazoles as Therapeutic Leads for Prion Diseases

*Alejandra Gallardo-Godoy,<sup>†</sup> Joel Gever,<sup>‡</sup> Kimberly L. Fife,<sup>‡</sup> B. Michael Silber,<sup>‡,◇</sup> Stanley B. Prusiner,<sup>‡,◇</sup>  
and Adam R. Renslo<sup>\*†,§</sup>*

<sup>†</sup>The Small Molecule Discovery Center, <sup>‡</sup>The Institute for Neurodegenerative Diseases, <sup>§</sup>Department of  
Pharmaceutical Chemistry and <sup>◇</sup>Department of Neurology, University of California, San Francisco, CA.

\*To whom correspondence should be addressed. Dr. Adam R. Renslo, Pharmaceutical Chemistry,  
University of California, San Francisco, San Francisco, CA 94158. Phone: (415) 514-9698; fax: (415)  
514-4507; E-mail: [adam.renslo@ucsf.edu](mailto:adam.renslo@ucsf.edu)

## Contents

**S-3.** Supplemental synthetic schemes for the synthesis of 2-aminothiazole analogs **4-50** and synthetic intermediates **I-1** through **I-25**.

**S-5.** Table of EC<sub>50</sub> and pEC<sub>50</sub> values (three separate determinations and corresponding means) for compounds **3-50** in the ELISA ScN2a-cl3 dividing cell assay; standard deviation and coefficient of variance values calculated from pEC<sub>50</sub> values. Table of EC<sub>50</sub> values (means of three determinations) for compounds **3-50** in the ELISA ScN2a-cl3 non-dividing cell assay and the calcein-AM assay (cell viability assay).

**S-7** 1D NOESY Spectra for compounds **49** and **50**, supporting the assigned sites of methylation and acylation respectively. Observed NOEs are between the CH<sub>3</sub> group (N-CH<sub>3</sub> or N-Ac) and the indicated positions on the quinoline ring.

## Supplementary Schemes

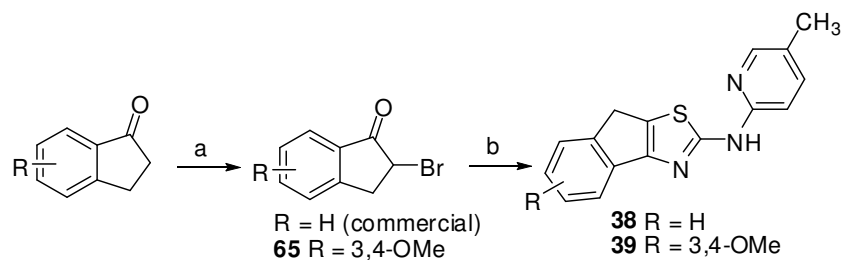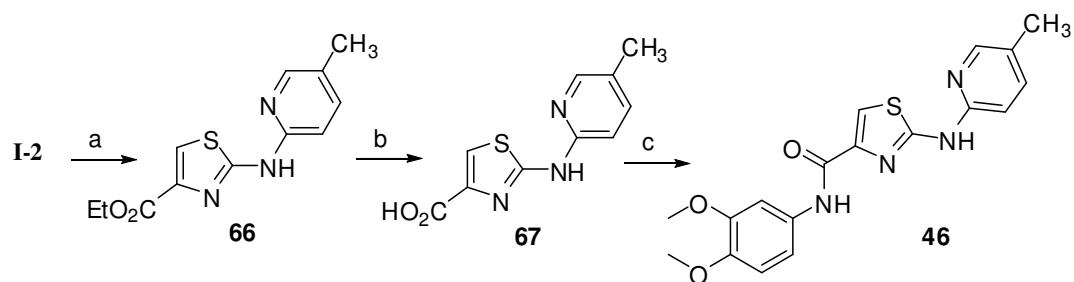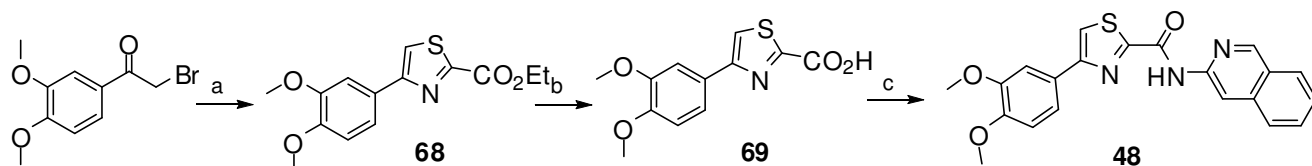

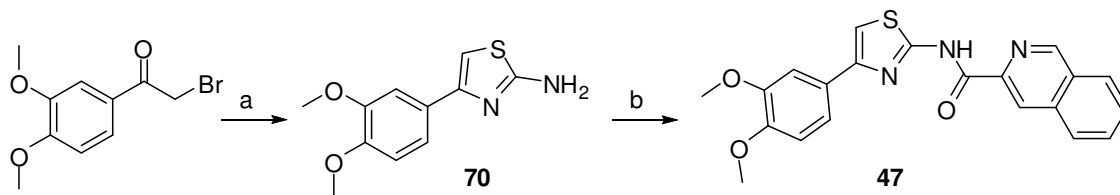

**Supplementary Scheme 4.** Synthesis of aminothiazole analog **47**. Reagents and conditions: a)  $\text{NH}_2\text{C}(=\text{S})\text{NH}_2$ , EtOH; (ii) 5N NaOH, MeOH; b) isoquinoline-3-carboxylic acid, HATU,  $\text{Et}_3\text{N}$ , THF.

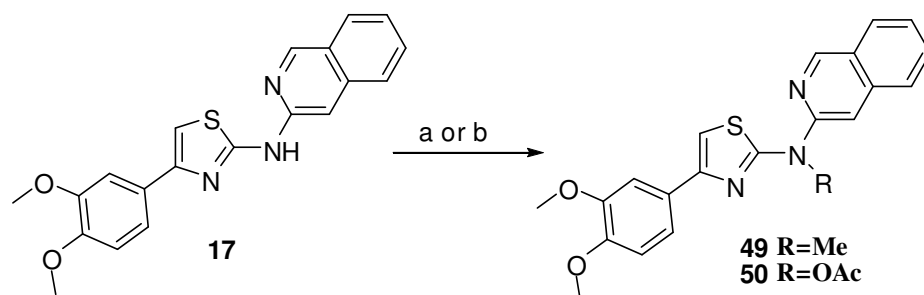

**Supplementary Scheme 5.** Synthesis of aminothiazole analogs **49-50**. Reagents and conditions: a) NaH, MeI, THF (for **49**); b) acetic anhydride, 100 °C (for **50**)

| Compound | Dividing<br>ELISA EC <sub>50</sub> (µM) |           |           |        | Dividing<br>ELISA pEC <sub>50</sub> (µM) |           |           |      | SD   | CV (%) |
|----------|-----------------------------------------|-----------|-----------|--------|------------------------------------------|-----------|-----------|------|------|--------|
|          | 1st Expt.                               | 2nd Expt. | 3rd Expt. | Mean   | 1st Expt.                                | 2nd Expt. | 3rd Expt. | Mean |      |        |
|          | 3                                       | 1.4       | 2.774     | 9.249  | 4.474                                    | 5.85      | 5.56      | 5.03 |      |        |
| 4        | 5.618                                   | 1.194     | 2.218     | 3.010  | 5.25                                     | 5.92      | 5.65      | 5.61 | 0.34 | 6      |
| 5        | > 32                                    | > 32      | > 32      | > 32   | > 4.5                                    | > 4.5     | > 4.5     |      |      |        |
| 6        | 11.8                                    | 6.474     | 6.384     | 8.219  | 4.93                                     | 5.19      | 5.19      | 5.10 | 0.15 | 3      |
| 7        | 1.413                                   | 1.159     | 1.097     | 1.223  | 5.85                                     | 5.94      | 5.96      | 5.92 | 0.06 | 1      |
| 8        | > 32                                    | 25.2      | 26.9      | >28    | > 4.5                                    | 4.60      | 4.57      |      |      |        |
| 9        | 7.402                                   | 7.295     | 4.445     | 6.381  | 5.13                                     | 5.14      | 5.35      | 5.21 | 0.13 | 2      |
| 10       | 3.254                                   | 6.706     | 1.85      | 3.937  | 5.49                                     | 5.17      | 5.73      | 5.46 | 0.28 | 5      |
| 11       | 26                                      | 9.233     | 11.7      | 15.644 | 4.59                                     | 5.03      | 4.93      | 4.85 | 0.24 | 5      |
| 12       | 2.93                                    | 2.048     | 2.617     | 2.532  | 5.53                                     | 5.69      | 5.58      | 5.60 | 0.08 | 1      |
| 13       | 1.073                                   | 1.004     | 0.917     | 0.998  | 5.97                                     | 6.00      | 6.04      | 6.00 | 0.03 | 1      |
| 14       | 0.974                                   | 0.577     | 0.815     | 0.789  | 6.01                                     | 6.24      | 6.09      | 6.11 | 0.12 | 2      |
| 15       | 13                                      | 2.067     | 6.809     | 7.292  | 4.89                                     | 5.68      | 5.17      | 5.25 | 0.41 | 8      |
| 16       | 1.134                                   | 0.736     | 1.131     | 1.000  | 5.95                                     | 6.13      | 5.95      | 6.01 | 0.11 | 2      |
| 17       | 0.101                                   | 0.117     | 0.108     | 0.109  | 7.00                                     | 6.93      | 6.97      | 6.96 | 0.03 | 0      |
| 18       | 0.486                                   | 0.34      | 0.453     | 0.426  | 6.31                                     | 6.47      | 6.34      | 6.38 | 0.08 | 1      |
| 19       | 0.436                                   | 0.317     | 0.413     | 0.389  | 6.36                                     | 6.50      | 6.38      | 6.41 | 0.07 | 1      |
| 20       | > 32                                    | > 32      | > 32      | > 32   | > 4.5                                    | > 4.5     | > 4.5     |      |      |        |
| 21       | 5.016                                   | 1.889     | 2.187     | 3.031  | 5.30                                     | 5.72      | 5.66      | 5.56 | 0.23 | 4      |
| 22       | > 32                                    | 26.1      | 30.2      | >29    | > 4.5                                    | 4.58      | 4.52      |      |      |        |
| 23       | 1.119                                   | 1.746     | 1.85      | 1.572  | 5.95                                     | 5.76      | 5.73      | 5.81 | 0.12 | 2      |
| 24       | 1.624                                   | 0.507     | 0.449     | 0.860  | 5.79                                     | 6.29      | 6.35      | 6.14 | 0.31 | 5      |
| 25       | 13                                      | 4.9       | 5.735     | 7.878  | 4.89                                     | 5.31      | 5.24      | 5.15 | 0.23 | 4      |
| 26       | 1.578                                   | 0.879     | 1.22      | 1.226  | 5.80                                     | 6.06      | 5.91      | 5.92 | 0.13 | 2      |
| 27       | 1.093                                   | 0.747     | 0.994     | 0.945  | 5.96                                     | 6.13      | 6.00      | 6.03 | 0.09 | 1      |
| 28       | 30                                      | 15.2      | > 32      | >26    | 4.52                                     | 4.82      | > 4.5     |      |      |        |
| 29       | > 32                                    | > 32      | > 32      | > 32   | > 4.5                                    | > 4.5     | > 4.5     |      |      |        |
| 30       | 0.226                                   | 0.385     | 0.414     | 0.342  | 6.65                                     | 6.41      | 6.38      | 6.48 | 0.14 | 2      |
| 31       | > 32                                    | > 32      | > 32      | > 32   | > 4.5                                    | > 4.5     | > 4.5     |      |      |        |
| 32       | 0.261                                   | 0.277     | 0.383     | 0.307  | 6.58                                     | 6.56      | 6.42      | 6.52 | 0.09 | 1      |
| 33       | 2.062                                   | 2.849     | 4.315     | 3.075  | 5.69                                     | 5.55      | 5.37      | 5.53 | 0.16 | 3      |
| 34       | 2.248                                   | 1.609     | 2.16      | 2.006  | 5.65                                     | 5.79      | 5.67      | 5.70 | 0.08 | 1      |
| 35       | 1.162                                   | 0.573     | 0.663     | 0.799  | 5.93                                     | 6.24      | 6.18      | 6.12 | 0.16 | 3      |
| 36       | > 32                                    | > 32      | > 32      | > 32   | > 4.5                                    | > 4.5     | > 4.5     |      |      |        |
| 37       | 8.999                                   | 7.257     | 9.711     | 8.656  | 5.05                                     | 5.14      | 5.01      | 5.07 | 0.07 | 1      |
| 38       | 1.989                                   | 2.993     | 2.339     | 2.440  | 5.70                                     | 5.52      | 5.63      | 5.62 | 0.09 | 2      |
| 39       | 3.454                                   | 5.926     | 7.382     | 5.587  | 5.46                                     | 5.23      | 5.13      | 5.27 | 0.17 | 3      |
| 40       | 0.395                                   | 0.11      | 0.183     | 0.229  | 6.40                                     | 6.96      | 6.74      | 6.70 | 0.28 | 4      |
| 41       | 0.369                                   | 0.166     | 0.219     | 0.251  | 6.43                                     | 6.78      | 6.66      | 6.62 | 0.18 | 3      |
| 42       | 0.629                                   | 0.599     | 0.585     | 0.604  | 6.20                                     | 6.22      | 6.23      | 6.22 | 0.02 | 0      |
| 43       | 1.054                                   | 1.1       | 1.671     | 1.275  | 5.98                                     | 5.96      | 5.78      | 5.90 | 0.11 | 2      |
| 44       | 0.926                                   | 0.733     | 0.794     | 0.818  | 6.03                                     | 6.13      | 6.10      | 6.09 | 0.05 | 1      |
| 45       | 3.161                                   | 3.254     | 6.833     | 4.416  | 5.50                                     | 5.49      | 5.17      | 5.38 | 0.19 | 4      |
| 46       | 3.194                                   | 1.927     | 2.205     | 2.442  | 5.50                                     | 5.72      | 5.66      | 5.62 | 0.11 | 2      |
| 47       | 9.812                                   | 3.932     | 10.8      | 8.181  | 5.01                                     | 5.41      | 4.97      | 5.13 | 0.24 | 5      |
| 48       | > 10                                    | > 10      | > 10      | > 10   | > 4.5                                    | > 4.5     | > 4.5     |      |      |        |
| 49       | 0.152                                   | 0.196     | 0.083     | 0.144  | 6.82                                     | 6.71      | 7.08      | 6.87 | 0.19 | 3      |
| 50       | 0.091                                   | 0.089     | 0.065     | 0.082  | 7.04                                     | 7.05      | 7.19      | 7.09 | 0.08 | 1      |

| Compound | Dividing                      | Non-Dividing                |
|----------|-------------------------------|-----------------------------|
|          | Calcein EC <sub>50</sub> (μM) | ELISA EC <sub>50</sub> (μM) |
|          | Mean (n = 3)                  | Mean (n = 3)                |
| 3        | > 10                          | > 10                        |
| 4        | > 32                          | > 32                        |
| 5        | > 32                          | > 32                        |
| 6        | > 32                          | > 32                        |
| 7        | > 32                          | > 32                        |
| 8        | > 32                          | > 32                        |
| 9        | > 32                          | > 32                        |
| 10       | > 32                          | > 32                        |
| 11       | > 32                          | > 32                        |
| 12       | > 32                          | > 32                        |
| 13       | > 32                          | > 32                        |
| 14       | > 32                          | > 32                        |
| 15       | > 32                          | > 32                        |
| 16       | > 32                          | > 32                        |
| 17       | > 32                          | > 32                        |
| 18       | > 32                          | > 32                        |
| 19       | > 32                          | > 32                        |
| 20       | > 32                          | > 32                        |
| 21       | > 32                          | > 32                        |
| 22       | > 32                          | > 32                        |
| 23       | > 32                          | > 32                        |
| 24       | 0.389                         | > 32                        |
| 25       | > 32                          | > 32                        |
| 26       | > 32                          | > 32                        |
| 27       | > 32                          | > 32                        |
| 28       | > 32                          | > 32                        |
| 29       | > 32                          | > 32                        |
| 30       | > 32                          | > 32                        |
| 31       | > 32                          | > 32                        |
| 32       | > 32                          | > 32                        |
| 33       | > 32                          | > 32                        |
| 34       | > 32                          | > 32                        |
| 35       | > 32                          | > 32                        |
| 36       | > 32                          | > 32                        |
| 37       | > 32                          | > 32                        |
| 38       | > 32                          | > 32                        |
| 39       | > 32                          | > 32                        |
| 40       | > 32                          | > 32                        |
| 41       | > 32                          | > 32                        |
| 42       | > 32                          | > 32                        |
| 43       | > 32                          | > 32                        |
| 44       | > 32                          | > 32                        |
| 45       | > 32                          | > 32                        |
| 46       | > 32                          | > 32                        |
| 47       | > 10                          | > 10                        |
| 48       | > 10                          | > 10                        |
| 49       | > 10                          | > 10                        |
| 50       | > 10                          | > 10                        |

# 1D NOESY Compound 49

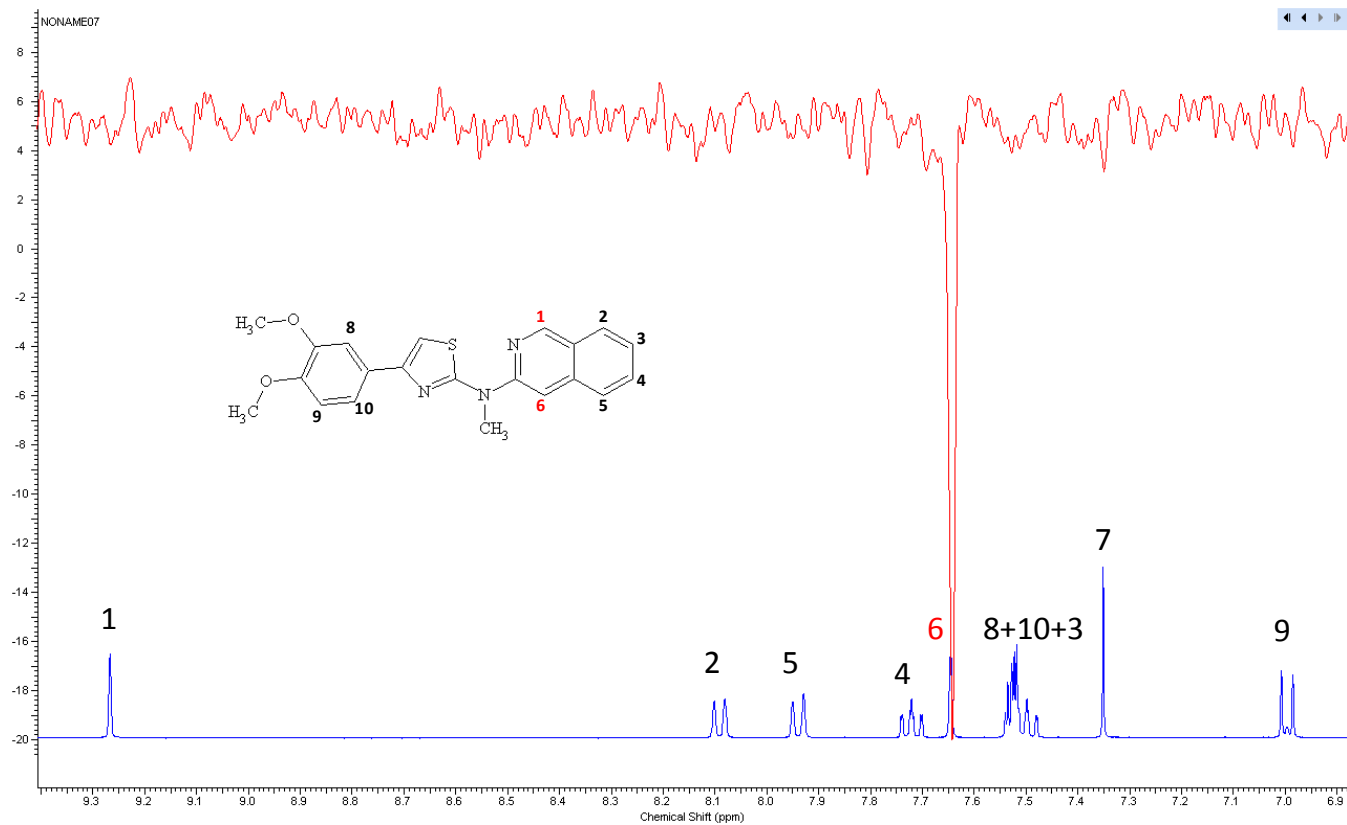

# 1D NOESY Compound 50

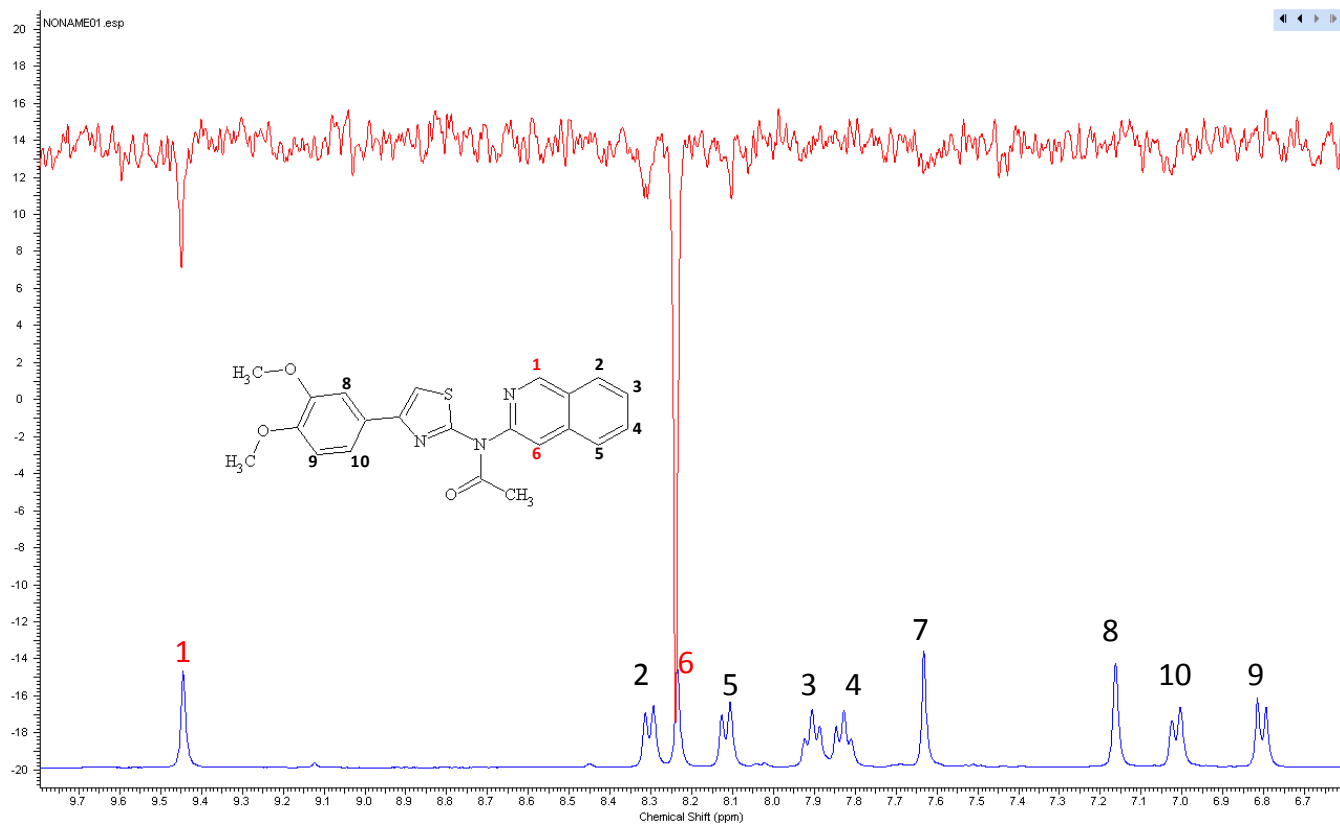

Supplement: NIHMS266461-supplement-1_si_001.pdf [file NIHMS266461-supplement-1_si_001.pdf]
